# Supplementary material
Source: PubMed Central journal article supplement (PMC404056)

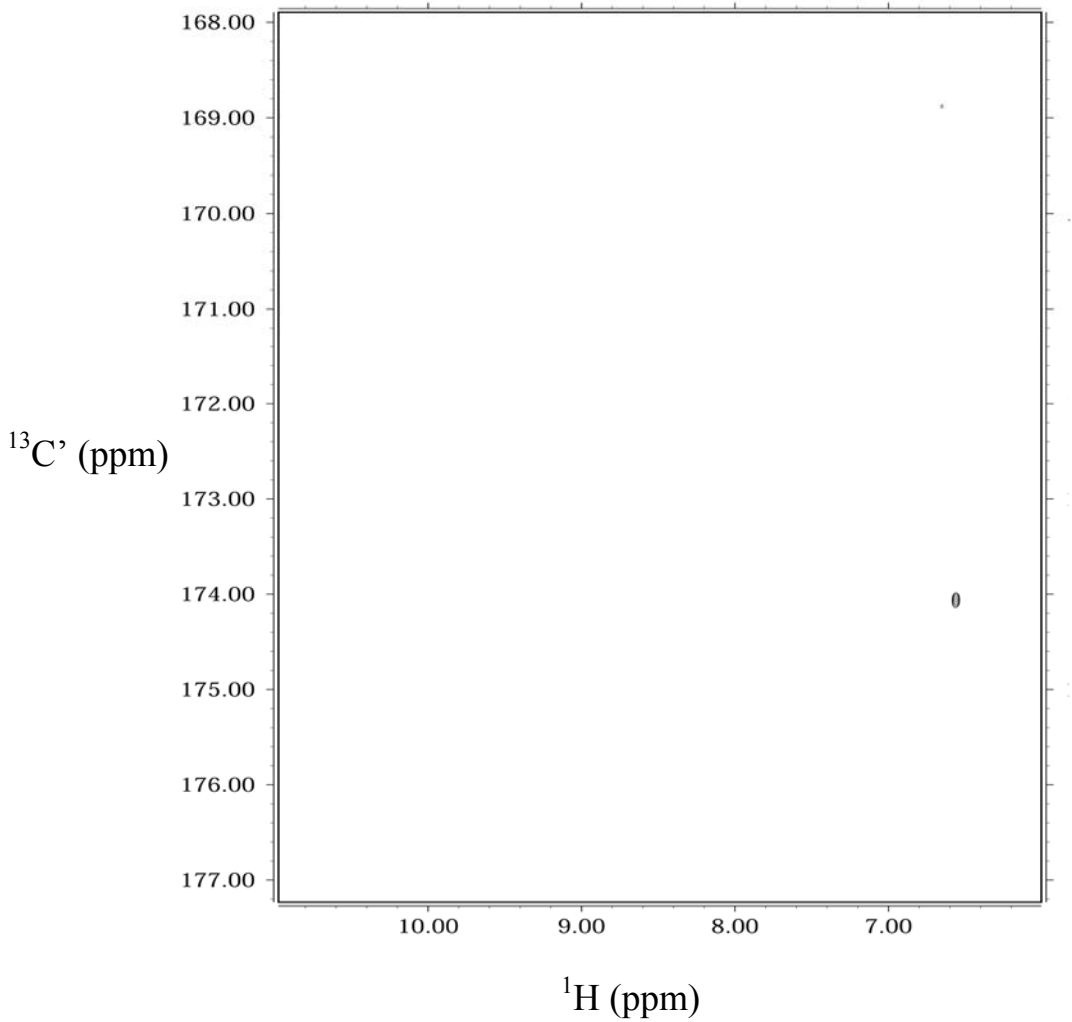

Supplement: pnas_101_17_6397__1.pdf [file pnas_101_17_6397__1.pdf]

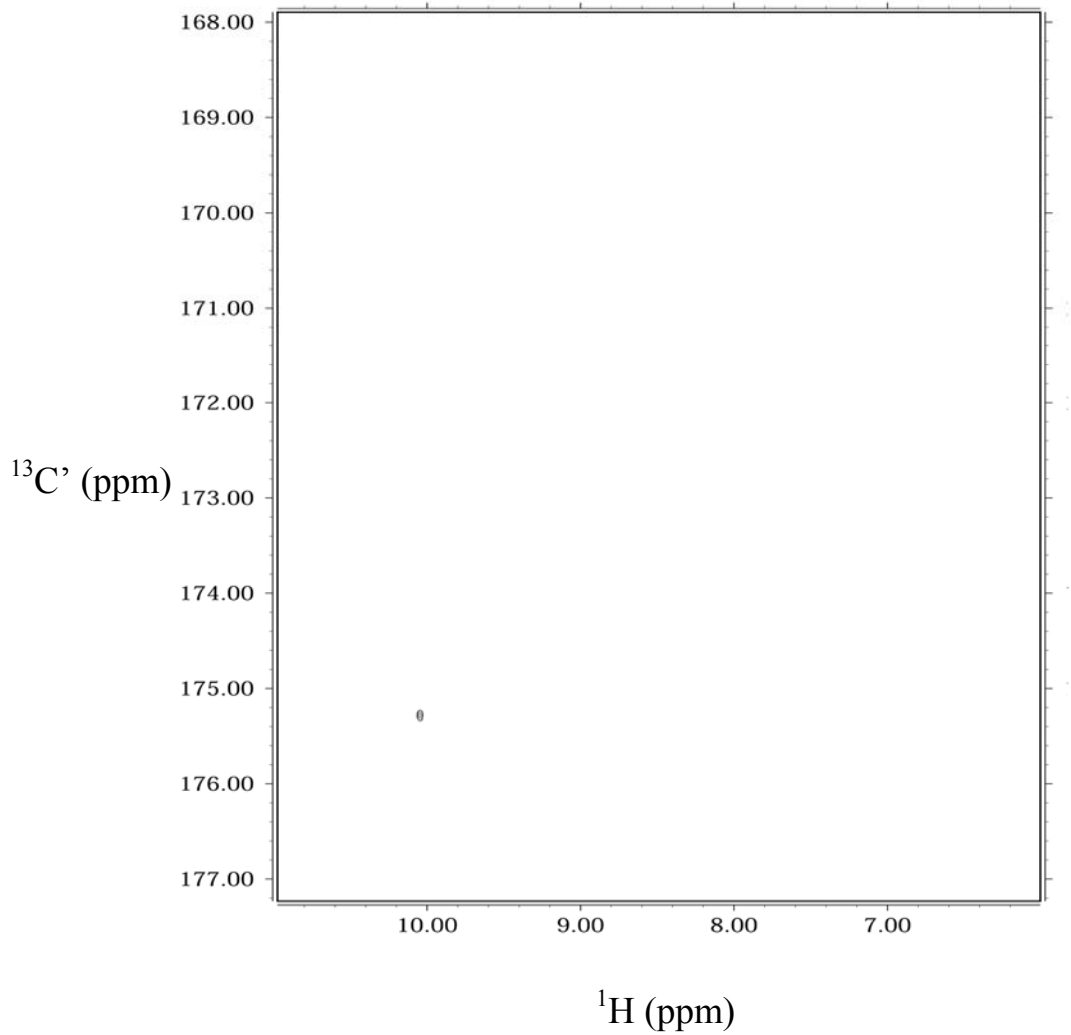

Supplement: pnas_101_17_6397__2.pdf [file pnas_101_17_6397__2.pdf]

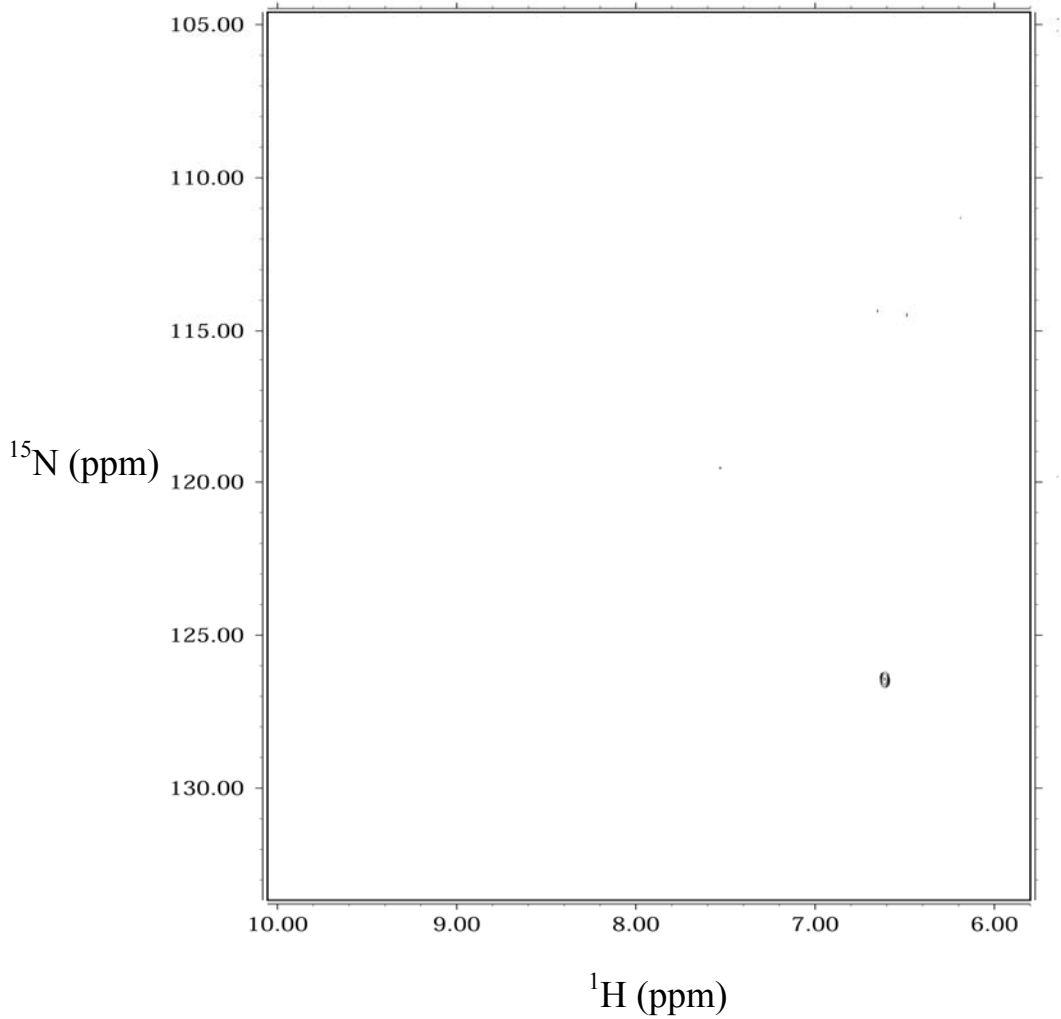

Supplement: pnas_101_17_6397__3.pdf [file pnas_101_17_6397__3.pdf]

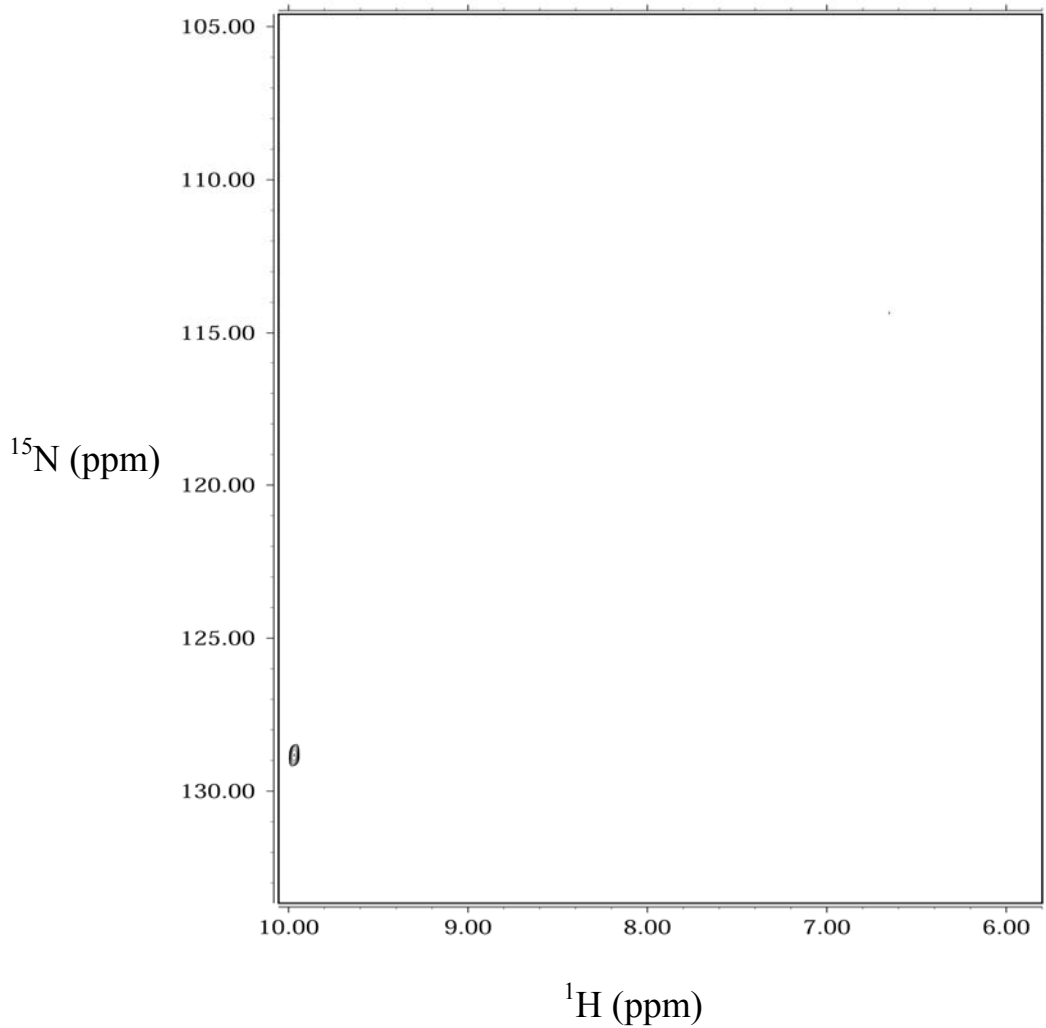

Supplement: pnas_101_17_6397__4.pdf [file pnas_101_17_6397__4.pdf]

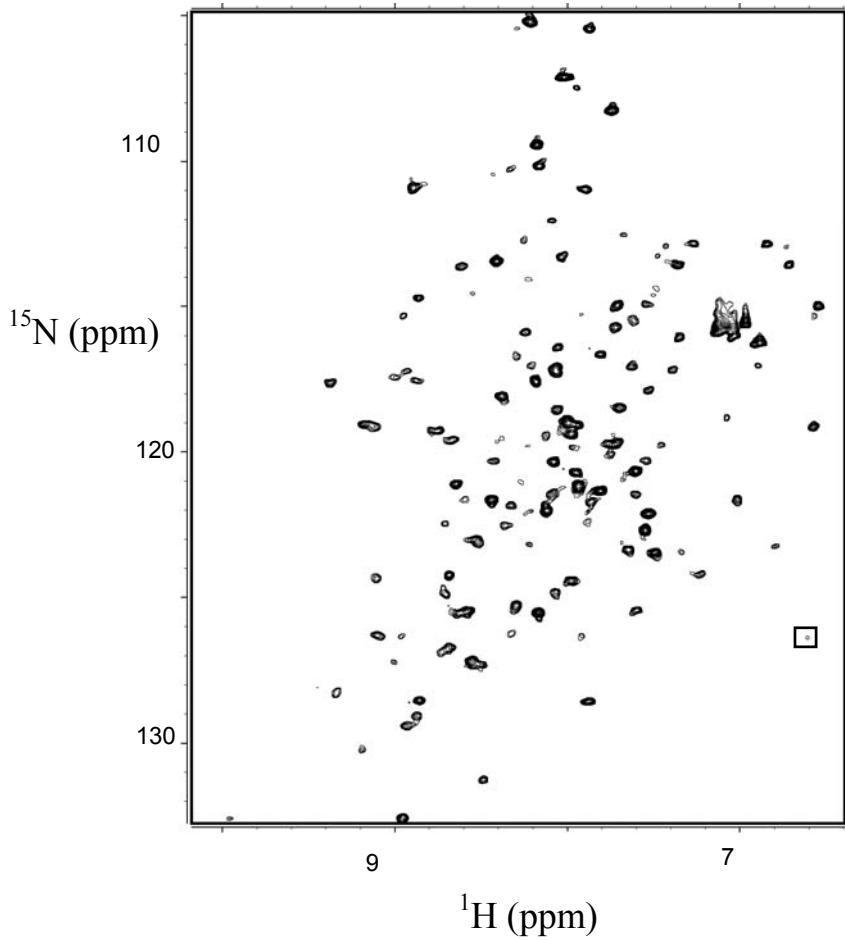

Supplement: pnas_101_17_6397__5.pdf [file pnas_101_17_6397__5.pdf]

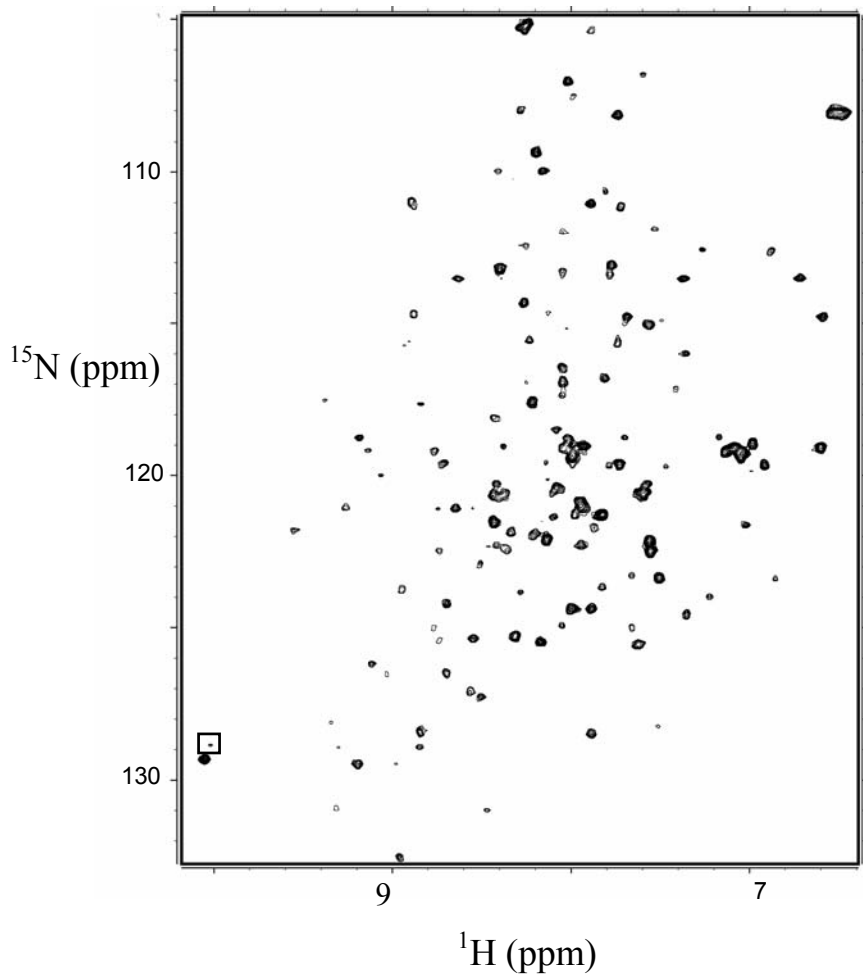

Supplement: pnas_101_17_6397__6.pdf [file pnas_101_17_6397__6.pdf]

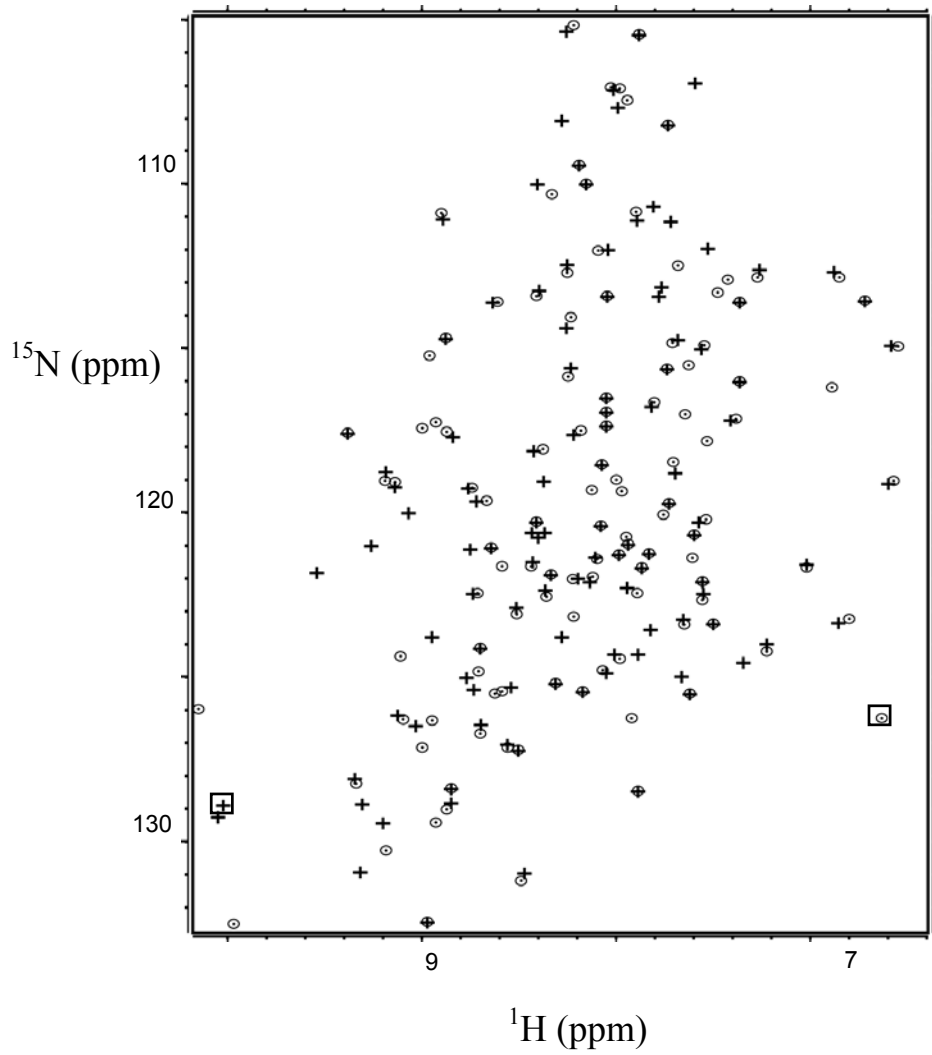

Supplement: pnas_101_17_6397__7.pdf [file pnas_101_17_6397__7.pdf]

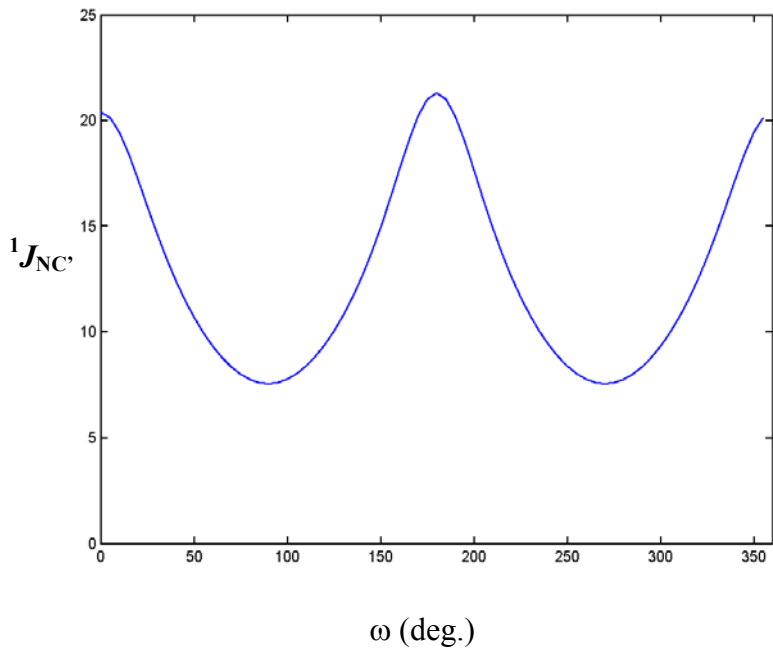

Supplement: pnas_101_17_6397__8.pdf [file pnas_101_17_6397__8.pdf]
